# Supplementary material for: Low E-Cadherin Expression is Associated with Poor Prognosis in Pulmonal Adenocarcinoma
Source: Research Square preprint supplement (doi:10.21203/rs.3.rs-7886889/v1), 2025-11-11
Supplement: Supplementary file 1 [file 157ec8fa5a01aae2a5446570.xlsx]

## Sheet: Sheet2
	Table 2. E-cadherin immunostaining in lung cancer.
				E-cadherin immunostaining
			n	negative (%)	weak (%)	moderate (%)	strong (%)	P
	All lung cancers		806	3.10174	4.21836	20.2233	72.4566
	Adenocarcinoma		448	1.11607	2.67857	10.0446	86.1607	<0.0001
	Squamous cell carcinoma		223	0	5.8296	30.0448	64.1256
	Mesothelioma		36	55.5556	8.33333	33.3333	2.77778
	Carcinoid		52	0	5.76923	46.1538	48.0769
	Large neuroendocrine carcinoma		15	0	0	33.3333	66.6667
	Large cell carcinoma		7	0	42.8571	28.5714	28.5714
	Carcinosarcoma		2	0	0	0	100
	Pleomorphic carcinoma		11	0	0	45.4545	54.5455
	Adenosquamous carcinoma		8	0	0	12.5	87.5
	Low-grade mucoepidermoid carcinoma		1	0	0	0	100
	Lymphoepithelial carcinoma		1	0	0	0	100
	SMARCA4-deficient undifferentiated tumor		2	0	0	100	0
