# Supplementary material for: Low E-Cadherin Expression is Associated with Poor Prognosis in Pulmonal Adenocarcinoma
Source: Research Square preprint supplement (doi:10.21203/rs.3.rs-7886889/v1), 2025-11-11
Supplement: Supplementary file 2 [file 3574e93d6410698ed41704ad.xlsx]

## Sheet: Sheet2
	Table 1. Patient cohort.
	Histological subtype	Study cohort	858 (100.0%)
		Adenocarcinoma	470 (54.8%)
		Squamous cell carcinoma	235 (27.4%)
		Mesothelioma	50 (5.8%)
		Carcinoid	52 (6.1%)
		Large cell neuroendocrine carcinoma	16 (1.9%)
		Large cell carcinoma	7 (0.8%)
		Carcinosarcoma	2 (0.2%)
		Pleomorphic carcinoma	14 (1.6%)
		Adenosquamous carcinoma	8 (0.9%)
		Low-grade mucoepidermoid carcinoma	1 (0.1%)
		Lymphoepithelial carcinoma	1 (0.1%)
		SMARCA4-deficient undifferentiated tumor	2 (0.2%)
	Adenocarcinoma only	Follow up	months (mean)	15.2
			censored (alive)	383 (88.9%)
			failed (dead)	48 (11.1%)
		Gender	female	258 (55.8%)
			male	204 (44.2%)
		Stage	pT1	157 (36.0%)
			pT2	165 (37.8%)
			pT3	58 (13.3%)
			pT4	56 (12.8%)
		Nodal stage	pN0	280 (68.6%)
			pN+	128 (31.4%)
		Grade	1-2	69 (37.9%)
			3	113 (62.1%)
		Resection margin	R0	420 (93.8%)
			R+	28 (6.2%)
	Squamous cell carcinoma only	Follow up	months (mean)	14.9
			censored (alive)	172 (83.1%)
			failed (dead)	35 (16.9%)
		Gender	female	70 (30.3%)
			male	161 (69.7%)
		Stage	pT1	58 (25.5%)
			pT2	66 (29.1%)
			pT3	43 (18.9%)
			pT4	60 (26.4%)
		Nodal stage	pN0	134 (59.8%)
			pN+	90 (40.2%)
		Grade	1-2	35 (38.0%)
			3	57 (61.9%)
		Resection margin	R0	204 (90.7%)
			R+	21 (9.3%)
	Percent in the column “study cohort on TMA” refers to the fraction of samples across each category. Because of cases with missing data, the numbers in the different categories do not always add up to the total number of cases.
