# Supplementary material for: Low E-Cadherin Expression is Associated with Poor Prognosis in Pulmonal Adenocarcinoma
Source: Research Square preprint supplement (doi:10.21203/rs.3.rs-7886889/v1), 2025-11-11
Supplement: Supplementary file 3 [file 47f62df57e58e4297c06f0ba.xlsx]

## Sheet: Sheet2
	Table 3. E-cadherin and cancer phenotype.
				E-cadherin immunostaining
			n	negative (%)	weak (%)	moderate (%)	strong (%)	P
	Adenocarcinoma only	pT1	146	0	2.05479	10.9589	86.9863	0.0127
		pT2	161	0	3.10559	6.21118	90.6832
		pT3	54	1.85185	5.55556	18.5185	74.0741
		pT4	54	5.55556	1.85185	11.1111	81.4815
		pN0	264	0.378788	1.89394	9.09091	88.6364	0.0483
		pN+	125	2.4	4.8	13.6	79.2
		G1-2	64	0	0	0	100	0.0351
		G3	109	0.917431	0.917431	6.42202	91.7431
		R0	399	1.00251	2.25564	9.77444	86.9674	0.0436
		R+	27	3.7037	11.1111	18.5185	66.6667
	Squamous cell carcinoma only	pT1	54	0	3.7037	18.5185	77.7778	0.1477
		pT2	65	0	3.07692	30.7692	66.1538
		pT3	38	0	5.26316	34.2105	60.5263
		pT4	58	0	10.3448	36.2069	53.4483
		pN0	124	0	4.83871	29.8387	65.3226	0.8076
		pN+	88	0	6.81818	30.6818	62.5
		G1-2	33	0	3.0303	15.1515	81.8182	0.9831
		G3	53	0	3.77358	15.0943	81.1321
		Any G	86	0	3.48837	15.1163	81.3953
		R0	193	0	4.66321	27.9793	67.3575	0.0147
		R+	20	0	15	50	35
	Abbreviations: pT: pathological tumor stage, G: Grade, pN: pathological lymph node status, R: resection status
